# Supplementary material
Source: ML conference proceedings conference paper supplement (https://proceedings.mlr.press/v84/yamada18a.html)
Supplement: Supplementary file [file yamada18a-supp.pdf]

# Supplementary materials: Post Selection Inference with Kernels

Makoto Yamada<sup>1,2,4</sup>, Yuta Umezu<sup>3</sup>, Kenji Fukumizu<sup>1,4</sup>, Ichiro Takeuchi<sup>1,3</sup>

<sup>1</sup>RIKEN AIP, <sup>2</sup>JST PRESTO, <sup>3</sup>Nagoya Institute of Technology,

<sup>4</sup>Institute of Statistical Mathematics

## Variance of bagging block HSIC

We will derive the variance of bagging block HSIC, and relate it with that of the full  $U$ -statistics and (unbagged) single block HSIC.

Let  $Z_i = (X_i, Y_i)$  ( $i = 1, 2, \dots, n$ ) be i.i.d. samples. HSIC can be expressed in the form of  $U$ -statistics of 4th degree:

$$U_n = \frac{1}{\binom{n}{4}} \sum_{S \in \mathfrak{S}_{n,4}} h(Z_S),$$

where  $h(z_1, z_2, z_3, z_4)$  is the  $U$ -statistic kernel corresponding to HSIC (see [1]),  $\mathfrak{S}_{n,k}$  is the set of all  $k$ -tuples (in this case  $k = 4$ ) of  $\{1, \dots, n\}$ , and  $Z_S$  is an abbreviation of  $(Z_{i_1}, \dots, Z_{i_k})$  for  $S = (i_1, \dots, i_k)$ .

Consider the block HSIC with block size  $B$ . For simplicity, let  $M := n/B$  denote the number of blocks for a single block HSIC estimator, and assume that  $n$  is taken so that  $M$  is an integer. The block HSIC is then defined by

$$W_B = \frac{1}{M} \sum_{b=1}^M U_B^{(b)}, \quad (1)$$

where  $U_B^{(b)}$  is the  $U$ -statistics corresponding to the empirical HSIC computed from only the  $B$  samples in the  $b$ -th block, namely,

$$U_B^{(b)} = \frac{1}{\binom{B}{4}} \sum_S h(Z_S),$$

where the sum is taken for all the quadruplets from  $b$ -th block. Note that  $W_B$  converges in law to a normal distribution as  $n \rightarrow \infty$  with  $B$  fixed, since  $U_B^{(b)}$  ( $b = 1, \dots, M$ ) are i.i.d. samples.

Recall that the bagging block HSIC with  $L$  random permutations is defined by

$$\xi_{L,B} := \frac{1}{L} \sum_{\ell=1}^L W_{\ell,B}, \quad (2)$$

where  $W_{\ell,B}$  is defined similarly to  $W_B$  in Eq. (1), but with a random permutation of  $Z_1, \dots, Z_n$ . We generate  $L$  independent uniform random permutations of  $\{1, \dots, n\}$ , and make copies of  $W_B$ . Note that, by the independence of the random permutations, given  $\mathbf{Z}_n = (Z_1, \dots, Z_n)$ ,  $W_{\ell,B}$  and  $W_{\ell',B}$  are independent for  $\ell \neq \ell'$ , but can be dependent unconditionally. The bagging block HSIC is simply the average over these  $L$  copies.

We rewrite  $\xi_{L,B}$  with the indicator of index. Let  $\mathcal{J}_{\ell,b}$  be the index set of the  $b$ -th block in the  $\ell$ -th permutation. For an arbitrary quadruplet  $S = (i_1, i_2, i_3, i_4)$ , define  $\theta_{\ell,b}(S)$  by

$$\theta_{\ell,b}(S) = \begin{cases} 1 & \text{if } S \in \mathcal{J}_{\ell,b} \\ 0 & \text{otherwise.} \end{cases}$$

Then, we have

$$\xi_{L,B} = \frac{1}{LM\binom{B}{4}} \sum_{\ell=1}^L \sum_{b=1}^M \sum_{S \in \mathfrak{S}_{n,4}} \theta_{\ell,b}(S) h(Z_S). \quad (3)$$

Since  $E[h(S)] = \text{HSIC}(X, Y)$ , it is obvious that

$$E[\xi_{L,B}] = \text{HSIC}(X, Y),$$

and thus  $\xi_{L,B}$  is an unbiased estimator of HSIC.

It is not difficult to see that, as estimators of HSIC, the standard  $U$ -statistics  $U_n$  has less variance than the block HSIC  $\xi_{1,B}$ , which is regarded as a special type of incomplete  $U$ -statistic. The next proposition asserts that the variance of  $\xi_{L,B}$ , under the assumption of independence  $X \perp\!\!\!\perp Y$ , interpolates the variances of these two estimators.

**Proposition 1** *Assume  $X_i$  and  $Y_i$  are independent. Then, we have*

$$\text{Var}[\xi_{L,B}] = \left(1 - \frac{1}{L}\right) \text{Var}[U_n] + \frac{1}{L} \text{Var}[\xi_{1,B}].$$

**(Proof)** For notational simplicity, we use  $h_S$  for  $h(Z_S)$ . It follows from the expression Eq. (3) that

$$\begin{aligned} \text{Var}[\xi_{L,B}] &= \frac{1}{(LM\binom{B}{4})^2} \sum_{\ell=1}^L \sum_{b=1}^M \sum_{\ell'=1}^L \sum_{b'=1}^M \sum_S \sum_T E[\theta_{\ell,b}(S) \theta_{\ell',b'}(T) h_S h_T] \\ &= \frac{1}{(LM\binom{B}{4})^2} \sum_{\ell=1}^L \sum_{\ell' \neq \ell}^L \sum_{b=1}^M \sum_{b'=1}^M \sum_S \sum_T E[\theta_{\ell,b}(S) \theta_{\ell',b'}(T) h_S h_T] \\ &\quad + \frac{1}{(LM\binom{B}{4})^2} \sum_{\ell=1}^L \sum_{b=1}^M \sum_{b'=1}^M \sum_S \sum_T E[\theta_{\ell,b}(S) \theta_{\ell,b'}(T) h_S h_T] \\ &=: I + II. \end{aligned}$$

Let  $p$  be the probability that  $\theta_{\ell,b}(S)$  takes 1, i.e.,  $p = P(\theta_{\ell,b}(S) = 1)$ . We have

$$p = \frac{\binom{n-4}{B-4}}{\binom{n}{4}} = \frac{\binom{B}{4}}{\binom{n}{4}}.$$

This can be confirmed as follows.  $p$  is the probability that  $S$  is included in a  $B$ -tuple of  $\{1, \dots, n\}$  when we uniformly take it. This is equal to the proportion of  $B$ -tuples including  $S$  among all the  $B$ -tuples, and thus the first equality. The second equality is simple computation.

From the independence of permutations,  $\theta_{\ell,b}(S)$  and  $\theta_{\ell',b'}(T)$  are independent if  $\ell \neq \ell'$ . Since  $h_S$  is a constant

given  $\mathbf{Z}_n$ , we have

$$\begin{aligned}
I &= \frac{1}{(LM\binom{B}{4})^2} \sum_{(\ell,\ell'):\ell\neq\ell'} \sum_{S,T} \sum_{b,b'} E[E[\theta_{\ell,b}(S)\theta_{\ell',b'}(T) \mid \mathbf{Z}_n]E[h_S h_T \mid \mathbf{Z}_n]] \\
&= \frac{1}{(LM\binom{B}{4})^2} \sum_{(\ell,\ell'):\ell\neq\ell'} \sum_{S,T} \sum_{b,b'} p^2 E[h_S h_T] \\
&= \frac{1}{(LM\binom{B}{4})^2} L(L-1)M^2 \frac{\binom{B}{4}^2}{\binom{n}{4}^2} \sum_{S,T} E[h_S h_T] \\
&= \frac{L-1}{L} \frac{1}{\binom{n}{4}^2} \sum_{S,T} E[h_S h_T] \\
&= \frac{L-1}{L} E\left[\left(\frac{1}{\binom{n}{4}} \sum_{S \in \mathfrak{S}_{n,4}} h_S\right)^2\right] \\
&= \frac{L-1}{L} \text{Var}[U_n].
\end{aligned}$$

The second term is given by

$$\begin{aligned}
II &= \frac{1}{(LM\binom{B}{4})^2} \sum_{\ell=1}^L \sum_{b,b'} \sum_{S,T} E[\theta_{\ell,b}(S)\theta_{\ell,b'}(T)h_S h_T] \\
&= \frac{1}{L^2} \sum_{\ell=1}^L E\left[\left(\frac{1}{M} \sum_b \frac{1}{\binom{B}{4}^2} \sum_S \theta_{\ell,b}(S)h_S\right)^2\right].
\end{aligned}$$

In the last line, the value in the squared bracket is exactly the same as a single block HSIC for the  $\ell$ -th sequence. Therefore,

$$II = \frac{1}{L} \text{Var}[\xi_{1,B}].$$

This completes the proof.

## False positive rate control

To check whether the methods can properly control the desired FPR, we run `hsicInf` using a dataset that has no relationship between input and output. Specifically, we generated the input output pairs as  $\{(\mathbf{x}_i, y_i)\}_{i=1}^n$ , where  $\mathbf{x} \sim N(\mathbf{0}, \mathbf{I}_{20})$ ,  $\mathbf{0} \in \mathbb{R}$  is the vector whose elements are all zero,  $\mathbf{I} \in \mathbb{R}^{20 \times 20}$  is the identity matrix, and  $y \sim N(0, 1)$ .

Figure 1 shows the FPRs of `hsicInf`, `hsic`, and `split` algorithms. The both the proposed method and `split` successfully control FPR, while `hsic` fails to control FPR. We see that the adjustment of the sampling distribution is crucial for estimating proper  $p$ -values. It shows that all FPRs tend to be high when the number of samples are small, and gradually converging to the significance level when the number of samples increases. Since `hsic` cannot control the FPR at the desired level, we do not compare the TPR of `hsic` in the following section.

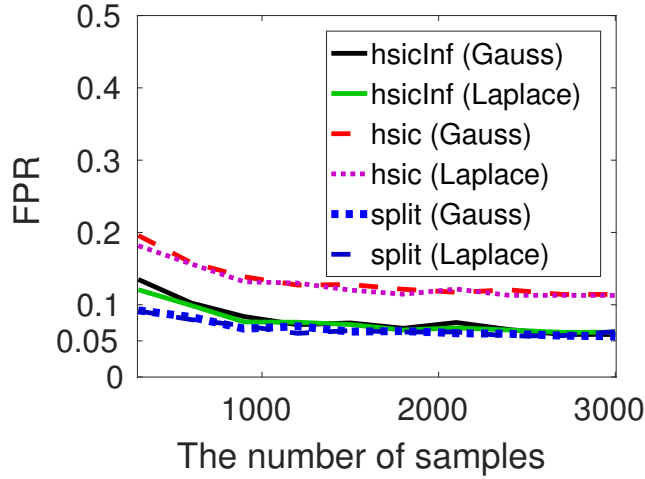

Figure 1: False positive rates at significant level  $\alpha = 0.05$  of the proposed methods. Comparison of `hsicInf`, `hsic`, `split`, and `larInf`. We used  $B = 10$  and  $L = 1$  for the HSIC based approaches. The `hsic` computes  $p$ -values without adjusting the sampling distribution by Theorem 1.

## Classification data

$$\begin{aligned}
 p(\mathbf{x}^{(1,2)}|y = 1) &= N\left(\begin{bmatrix} -3 \\ 0 \end{bmatrix}, \begin{bmatrix} 1 & 0 \\ 0 & 1 \end{bmatrix}\right) \\
 p(\mathbf{x}^{(1,2)}|y = 2) &= N\left(\begin{bmatrix} 3 \\ 0 \end{bmatrix}, \begin{bmatrix} 1 & 0 \\ 0 & 1 \end{bmatrix}\right) \\
 p(\mathbf{x}^{(1,2)}|y = 3) &= 0.5N\left(\begin{bmatrix} 0 \\ 3 \end{bmatrix}, \begin{bmatrix} 1 & 0 \\ 0 & 2.25 \end{bmatrix}\right) + 0.5N\left(\begin{bmatrix} 0 \\ -3 \end{bmatrix}, \begin{bmatrix} 1 & 0 \\ 0 & 2.25 \end{bmatrix}\right).
 \end{aligned}$$

Then, we generated the final feature  $\mathbf{x} = [(\mathbf{x}^{(1,2)})^\top \tilde{\mathbf{x}}^\top]^\top$  where  $\tilde{\mathbf{x}} \in \mathbb{R}^{18}$  and  $\tilde{\mathbf{x}} \sim N(\mathbf{0}, \mathbf{I})$ .

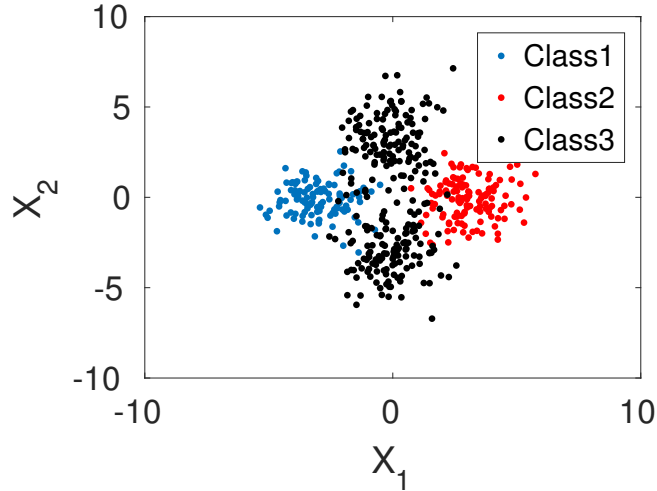

Figure 2: The multi-class classification dataset.

## Block parameter comparison $L = 1$

For this experiment, we first generated the input matrix  $\mathbf{X} = [\mathbf{x}_1, \dots, \mathbf{x}_n] \in \mathbb{R}^{d \times n}$  where  $\mathbf{x} \sim N(\mathbf{0}, \bar{\Sigma})$ ,  $[\bar{\Sigma}]_{ij} = 0.95\delta_{ij} + 0.05$ ,  $i, j \in \{1, 2, 3, 4, 5\}$ ,  $[\bar{\Sigma}]_{ii} = \delta_{ij}$ ,  $i, j \in \{6, \dots, d\}$ ,  $\delta_{ij} = 1$  if  $i = j$  and 0 otherwise, and  $d = \{20, 500\}$  and  $n = \{300, 600, \dots, 3000\}$ .

Then, we generated the corresponding output variable as

- **Linear:**  $Y = \sum_{i=1}^5 X_i + 0.1E$ ,
- **Additive Non-linear:**  $Y = \sum_{i=1}^5 X_i^2 + 0.1E$ ,
- **Non-additive Non-linear:**  
 $Y = X_1 \exp(X_2) X_3 \exp(X_4) X_5 + 0.1E$ ,

where  $E \sim N(0, 1)$  is an independent random noise.

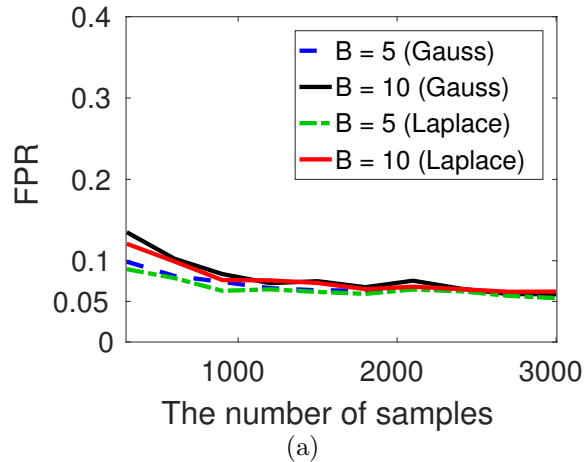

Figure 3: False positive rates at significant level  $\alpha = 0.05$  of the proposed methods. FPRs for `hsicInf` with different block parameter  $B$ .

## References

- [1] L. Song, A. Smola, A. Gretton, J. Bedo, and K. Borgwardt. Feature selection via dependence maximization. *JMLR*, 13:1393–1434, 2012.

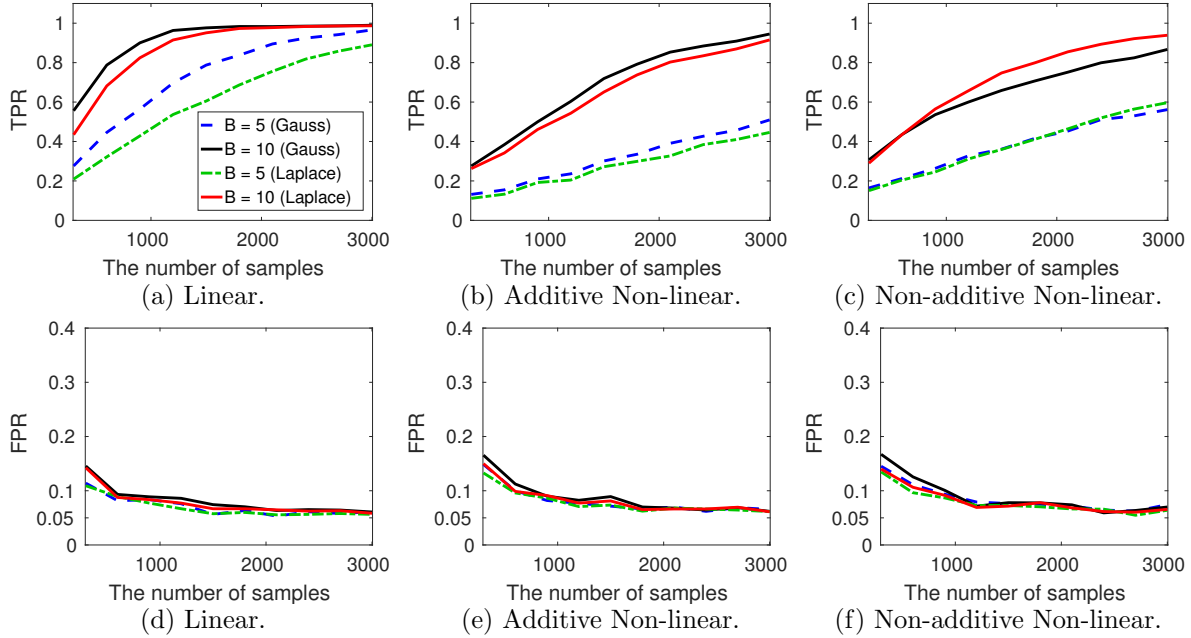

Figure 4: The results for  $\text{hsicInf}$  in uni-variate setups with different block parameter  $B$ . (a)-(c): TPR for the three datasets. (d)-(f): FPR for the three datasets.

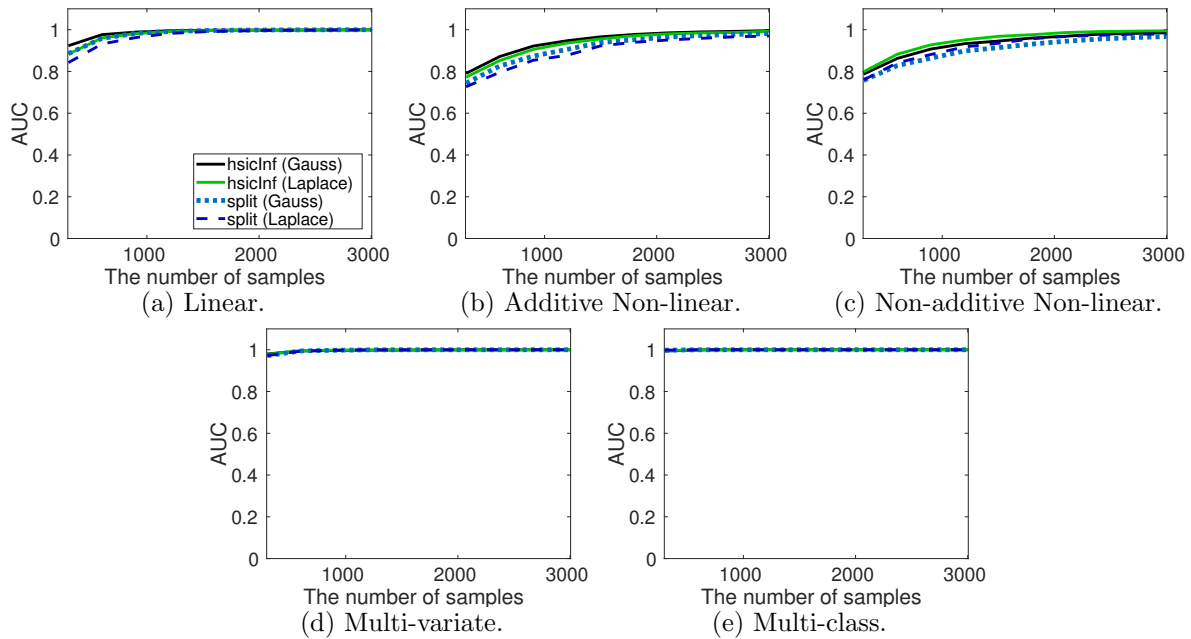

Figure 5: The average AUC scores.

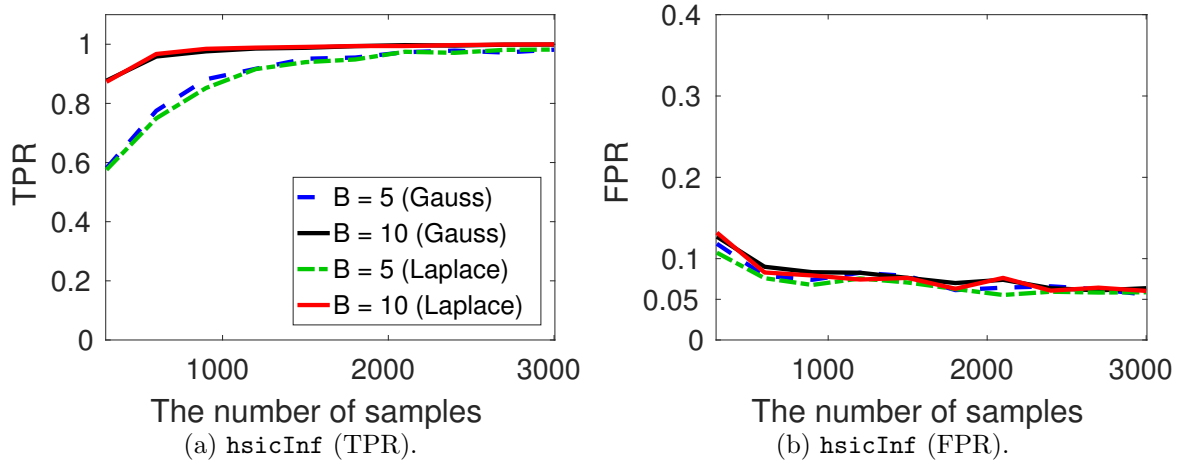

Figure 6: The results for the multi-variate regression dataset. TPRs and FPRs of `hsicInf` with different block size  $B$ .

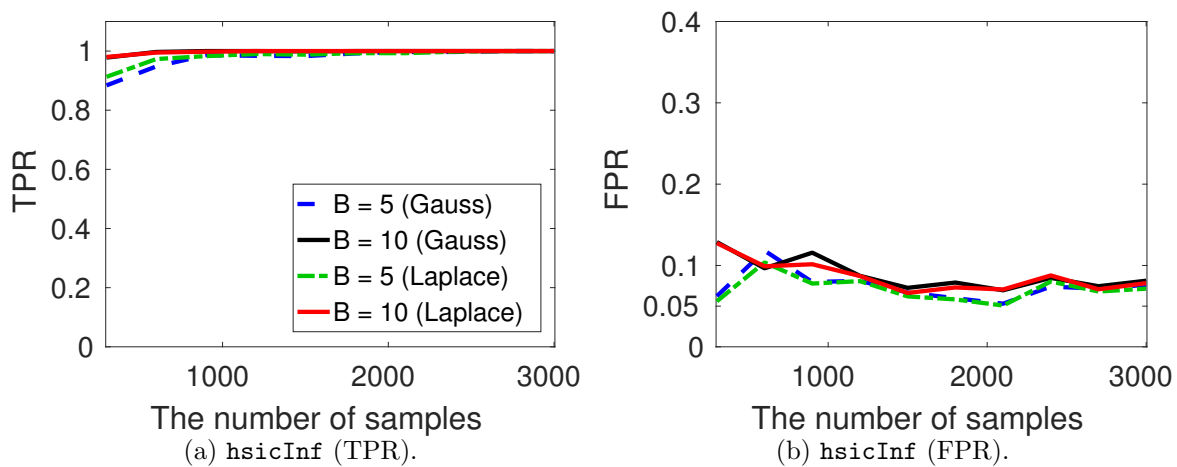

Figure 7: The results for the multi-class classification dataset. TPRs and FPRs of `hsicInf` with different block size  $B$ .
